# Supplementary material for: Trends in Cancer Mortality Among Black Individuals in the US From 1999 to 2019
Source: PubMed Central journal article supplement (PMC9121301; doi:10.1001/jamaoncol.2022.1472), 2022-05-19
Supplement: jamaoncol-e221472-s001.pdf [file jamaoncol-e221472-s001.pdf]

## Supplemental Online Content

Lawrence WR, McGee-Avila JK, Vo JB, et al. Trends in cancer mortality among Black individuals in the US from 1999 to 2019. *JAMA Oncol*. Published online May 19, 2022. doi:10.1001/jamaoncol.2022.1472

**eTable 1.** Cancer Mortality by Site Based on *ICD-10* Codes

**eTable 2.** Age-Adjusted Mortality Rates for the Most Common Causes of Cancer Death by Sex Among Black Individuals in the United States, 1999-2019

**eTable 3.** Annual Percentage Changes in Cancer Death Rates by Sex and Cancer Site Among Black Individuals From 1999 to 2019 in the United States

**eFigure 1.** Trends in Age-standardized Cancer Death Rates (1999-2019) Among Black Individuals by Age Group

**eFigure 2.** Trends in Age-standardized Death Rates (1999-2019) Among Black Men by Cancer Site and Age Group

**eFigure 3.** Trends in Age-standardized Death Rates (1999-2019) Among Black Women by Cancer Site and Age Group

This supplemental material has been provided by the authors to give readers additional information about their work.

| <b>eTable 1. Cancer mortality by site based on ICD-10 codes</b>                                                                |               |
|--------------------------------------------------------------------------------------------------------------------------------|---------------|
| SEER Cause of Death Label                                                                                                      | ICD-10        |
| All Malignant Cancers                                                                                                          | C00-C97       |
| Breast                                                                                                                         | C50           |
| Cervix Uteri                                                                                                                   | C53           |
| Colon and Rectum                                                                                                               | C18, C20      |
| Corpus and Uterus, NOS                                                                                                         | C54-C55       |
| Kidney and Renal Pelvis                                                                                                        | C64-C65       |
| Leukemia                                                                                                                       | C91-C95       |
| Liver and Intrahepatic Bile                                                                                                    | C22           |
| Lung and Bronchus                                                                                                              | C34           |
| Non-Hodgkin Lymphoma                                                                                                           | C82, C83, C85 |
| Ovary                                                                                                                          | C56           |
| Pancreas                                                                                                                       | C25           |
| Prostate                                                                                                                       | C61           |
| Stomach                                                                                                                        | C16           |
| Urinary Bladder                                                                                                                | C67           |
| <i>Abbreviations:</i> ICD-10, International Statistical Classification of Diseases and Related Health Problems, Tenth Revision |               |

| <b>eTable 2.</b> Age-adjusted mortality rates for the most common causes of cancer death by sex among Black individuals in the United States, 1999-2019 |                         |       |
|---------------------------------------------------------------------------------------------------------------------------------------------------------|-------------------------|-------|
|                                                                                                                                                         | 1999-2019 (Per 100,000) |       |
| cancer site or type                                                                                                                                     | Men                     | Women |
| All malignant cancers                                                                                                                                   | 377.3                   | 239.4 |
| Lung and Bronchus                                                                                                                                       | 104.2                   | 49.9  |
| Prostate                                                                                                                                                | 68.5                    | NA    |
| Female Breast                                                                                                                                           | NA                      | 43.6  |
| Colon and Rectum                                                                                                                                        | 38.7                    | 26.1  |
| Pancreas                                                                                                                                                | 21.8                    | 17.6  |
| Ovary                                                                                                                                                   | NA                      | 9.4   |
| Leukemia                                                                                                                                                | 10.8                    | 6.5   |
| Corpus and Uterus, NOS                                                                                                                                  | NA                      | 11.3  |
| Liver and intrahepatic bile duct                                                                                                                        | 17.4                    | 6.2   |
| Non-Hodgkin Lymphoma                                                                                                                                    | 8.2                     | 5.1   |
| Urinary Bladder                                                                                                                                         | 7.7                     | 3.6   |
| Kidney and Renal Pelvis                                                                                                                                 | 8.0                     | 3.5   |
| Stomach                                                                                                                                                 | 13.4                    | 6.4   |
| Myeloma                                                                                                                                                 | 11.1                    | 7.9   |
| Cervix Uteri                                                                                                                                            | NA                      | 5.8   |

Rates are per 100,000 and age-adjusted to the 2000 US Std Population (19 age groups - Census P25-1130) standard.  
*Abbreviation:* NOS = not otherwise specified; NA, not applicable

| <b>eTable 3.</b> Annual percentage changes in cancer death rates by sex and cancer site among Black individuals from 1999 to 2019 in the United States |                              |           |                   |           |                   |           |                   |           |    |
|--------------------------------------------------------------------------------------------------------------------------------------------------------|------------------------------|-----------|-------------------|-----------|-------------------|-----------|-------------------|-----------|----|
| Cause of death                                                                                                                                         | Average APC from (1999-2019) | Segment 1 |                   | Segment 2 |                   | Segment 3 |                   | Segment 4 |    |
| <b>All Malignant Cancers</b>                                                                                                                           |                              |           |                   |           |                   |           |                   |           |    |
|                                                                                                                                                        | -2.0 (-2.1, -2.0)            | 1999-2019 | -2.0 (-2.1, -2.0) | NA        | NA                | NA        | NA                | NA        | NA |
| <b>Men</b>                                                                                                                                             |                              |           |                   |           |                   |           |                   |           |    |
| Overall cancer                                                                                                                                         | -2.6 (-2.6, -2.6)            | 1999-2019 | -2.6 (-2.6, -2.6) | NA        | NA                | NA        | NA                | NA        | NA |
| Prostate                                                                                                                                               | -3.4 (-3.8, -3.0)            | 1999-2014 | -4.0 (-4.3, -3.7) | 2014-2019 | -1.6 (-3.3, 0.0)  | NA        | NA                | NA        | NA |
| Colon and Rectum                                                                                                                                       | -2.6 (-2.7, -2.4)            | 1999-2019 | -2.6 (-2.7, -2.4) | NA        | NA                | NA        | NA                | NA        | NA |
| Kidney and Renal Pelvis                                                                                                                                | -1.1 (-1.4, -0.8)            | 1999-2019 | -1.1 (-1.4, -0.8) | NA        | NA                | NA        | NA                | NA        | NA |
| Pancreas                                                                                                                                               | -0.2 (-0.4, -0.1)            | 1999-2019 | -0.2 (-0.4, -0.1) | NA        | NA                | NA        | NA                | NA        | NA |
| Lung and Bronchus                                                                                                                                      | -3.8 (-4.0, -3.6)            | 1999-2003 | -2.5 (-3.2, -1.8) | 2003-2013 | -3.3 (-3.5, -3.1) | 2013-2019 | -5.5 (-5.9, -5.1) | NA        | NA |
| Liver and Intrahepatic Bile                                                                                                                            | 1.7 (1.4, 2.0)               | 1999-2013 | 3.0 (2.7, 3.3)    | 2013-2019 | -1.3 (-2.1, -0.4) | NA        | NA                | NA        | NA |
| Urinary Bladder                                                                                                                                        | -0.4 (-0.7, -0.0)            | 1999-2019 | -0.4 (-0.7, -0.0) | NA        | NA                | NA        | NA                | NA        | NA |
| Stomach                                                                                                                                                | -3.2 (-3.4, -3.0)            | 1999-2019 | -3.2 (-3.4, -3.0) | NA        | NA                | NA        | NA                | NA        | NA |
| Leukemia                                                                                                                                               | -1.6 (-2.1, -1.1)            | 1999-2008 | -0.6 (-1.6, 0.3)  | 2008-2019 | -2.4 (-3.1, -1.8) | NA        | NA                | NA        | NA |
| Non-Hodgkin Lymphoma                                                                                                                                   | -1.8 (-2.1, -1.4)            | 1999-2019 | -1.8 (-2.1, -1.4) | NA        | NA                | NA        | NA                | NA        | NA |
| Myeloma                                                                                                                                                | -1.0 (-1.2, -0.8)            | 1999-2019 | -1.0 (-1.2, -0.8) | NA        | NA                | NA        | NA                | NA        | NA |
|                                                                                                                                                        |                              |           |                   |           |                   |           |                   |           |    |
| <b>Women</b>                                                                                                                                           |                              |           |                   |           |                   |           |                   |           |    |
| Overall cancer                                                                                                                                         | -1.5 (-1.7, -1.3)            | 1999-2002 | -0.9 (-2.1, 0.2)  | 2002-2019 | -1.6 (-1.7, -1.5) | NA        | NA                | NA        | NA |
| Breast                                                                                                                                                 | -1.4 (-1.5, -1.3)            | 1999-2019 | -1.4 (-1.5, -1.3) | NA        | NA                | NA        | NA                | NA        | NA |
| Colon and Rectum                                                                                                                                       | -3.0 (-3.2, -2.9)            | 1999-2019 | -3.0 (-3.2, -2.9) | NA        | NA                | NA        | NA                | NA        | NA |
| Kidney and Renal Pelvis                                                                                                                                | -1.8 (-2.4, -1.1)            | 1999-2011 | -0.8 (-1.6, -0.1) | 2011-2019 | -3.1 (-4.5, -1.8) | NA        | NA                | NA        | NA |
| Pancreas                                                                                                                                               | -0.2 (-0.3, -0.1)            | 1999-2019 | -0.2 (-0.3, -0.1) | NA        | NA                | NA        | NA                | NA        | NA |
| Lung and Bronchus                                                                                                                                      | -2.0 (-2.3, -1.8)            | 1999-2005 | 0.1 (-0.5, 0.7)   | 2005-2013 | -1.9 (-2.3, -1.4) | 2013-2019 | -4.4 (-4.9, -3.8) | NA        | NA |

|                             |                   |           |                   |           |                   |           |                   |           |                   |
|-----------------------------|-------------------|-----------|-------------------|-----------|-------------------|-----------|-------------------|-----------|-------------------|
| Liver and Intrahepatic Bile | 1.1 (0.0, 2.3)    | 1999-2017 | 1.8 (1.3, 2.2)    | 2017-2019 | -4.4 (-14.7, 7.2) | NA        | NA                | NA        | NA                |
| Urinary Bladder             | -1.4 (-1.8, -1.1) | 1999-2019 | -1.4 (-1.8, -1.1) | NA        | NA                | NA        | NA                | NA        | NA                |
| Stomach                     | -3.4 (-3.6, -3.2) | 1999-2019 | -3.4 (-3.6, -3.2) | NA        | NA                | NA        | NA                | NA        | NA                |
| Ovary                       | -1.3 (-2.9, -0.4) | 1999-2004 | 1.0 (-0.9, 3.0)   | 2004-2007 | -4.7 (-12.5, 3.8) | 2007-2010 | 0.9 (-7.3, 9.9)   | 2010-2019 | -2.2 (-2.9, -1.4) |
| Cervix Uteri                | -2.5 (-2.8, -2.2) | 1999-2019 | -2.5 (-2.8, -2.2) | NA        | NA                | NA        | NA                | NA        | NA                |
| Corpus and Uterus, NOS      | 1.3 (0.5, 2.2)    | 1999-2009 | 0.6 (-0.1, 1.1)   | 2009-2012 | 4.0 (-1.9, 10.4)  | 2012-2019 | 1.3 (0.6, 2.0)    | NA        | NA                |
| Leukemia                    | -1.4 (-1.6, -1.1) | 1999-2019 | -1.4 (-1.6, -1.1) | NA        | NA                | NA        | NA                | NA        | NA                |
| Non-Hodgkin Lymphoma        | -2.0 (-2.3, -1.8) | 1999-2019 | -2.0 (-2.3, -1.8) | NA        | NA                | NA        | NA                | NA        | NA                |
| Myeloma                     | -1.7 (-2.8, -0.7) | 1999-2009 | -2.6 (-3.4, -1.8) | 2009-2013 | 2.5 (-2.6, 7.9)   | 2013-2019 | -3.1 (-4.7, -1.5) | NA        | NA                |

Segments were chosen by Joinpoint regression.

Abbreviations: APC, Annual percentage change; NA, not applicable

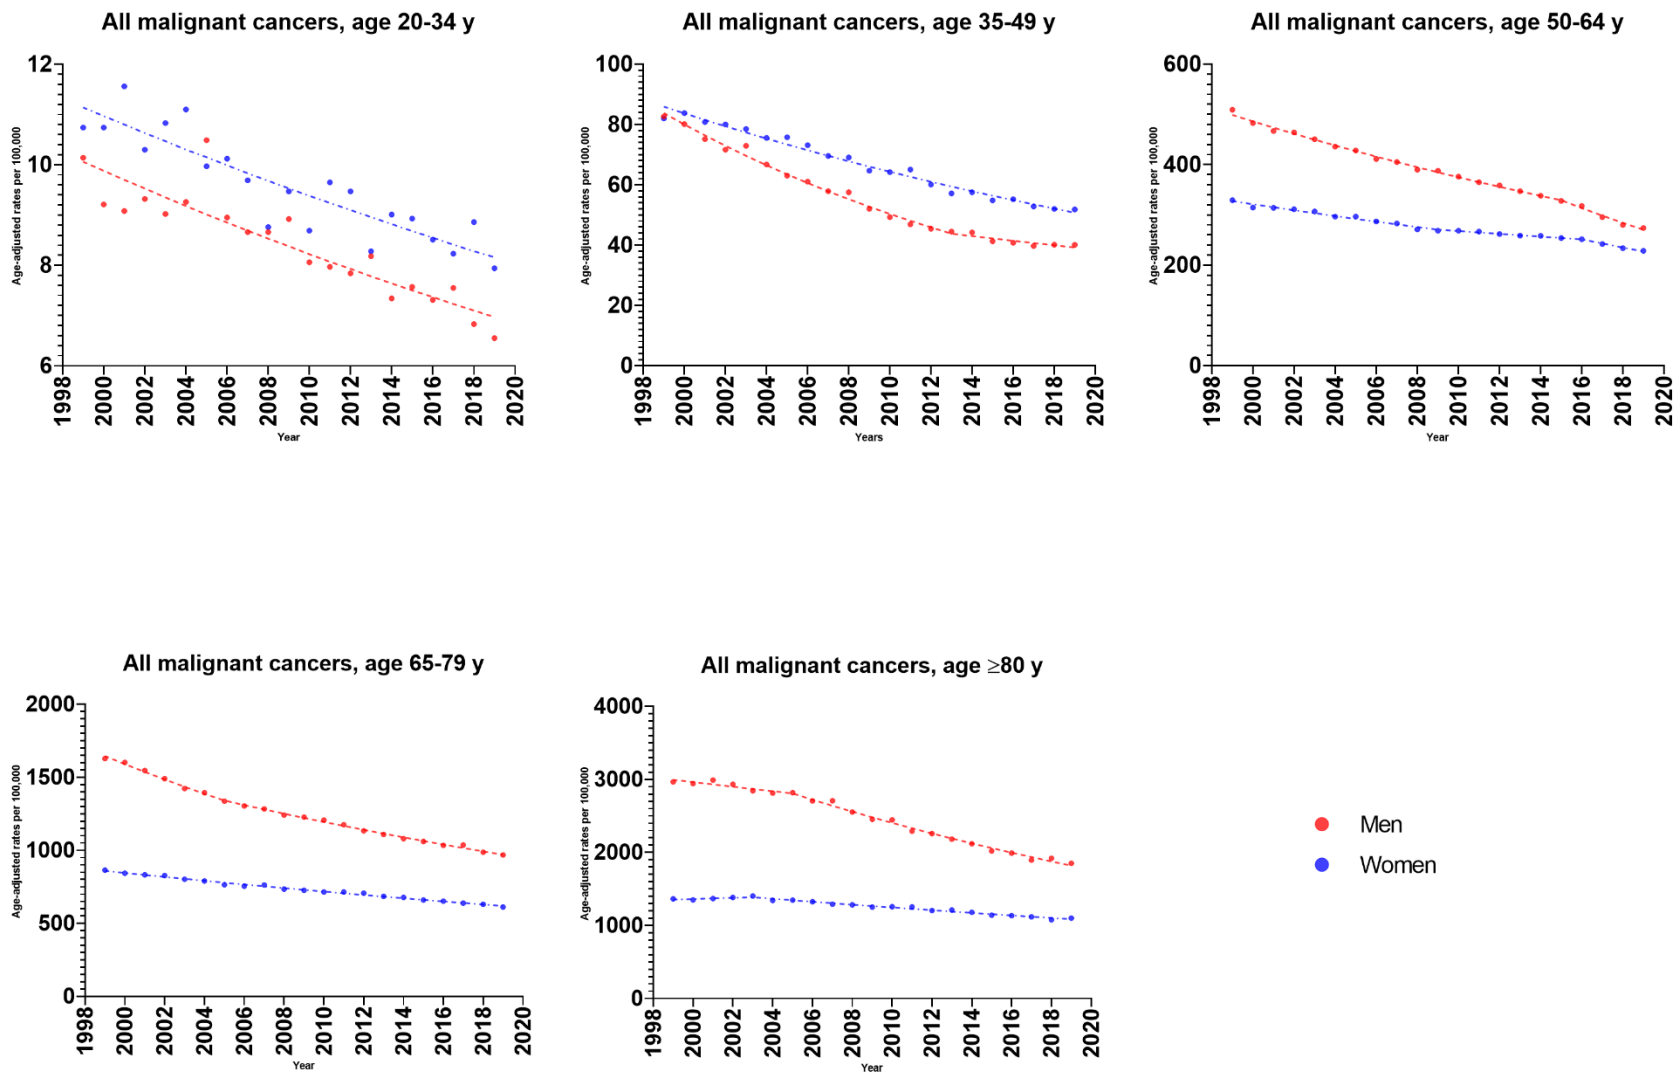

**eFigure 1.** Trends in age-standardized cancer death rates (1999-2019) among Black individuals by age group. Death rates covered the entire US population. Trends were estimated using joinpoint regression and characterized by rate per 100,000.  
*Note:* “---“represents modeled age-adjusted and “●” represents observed age-adjusted rates.

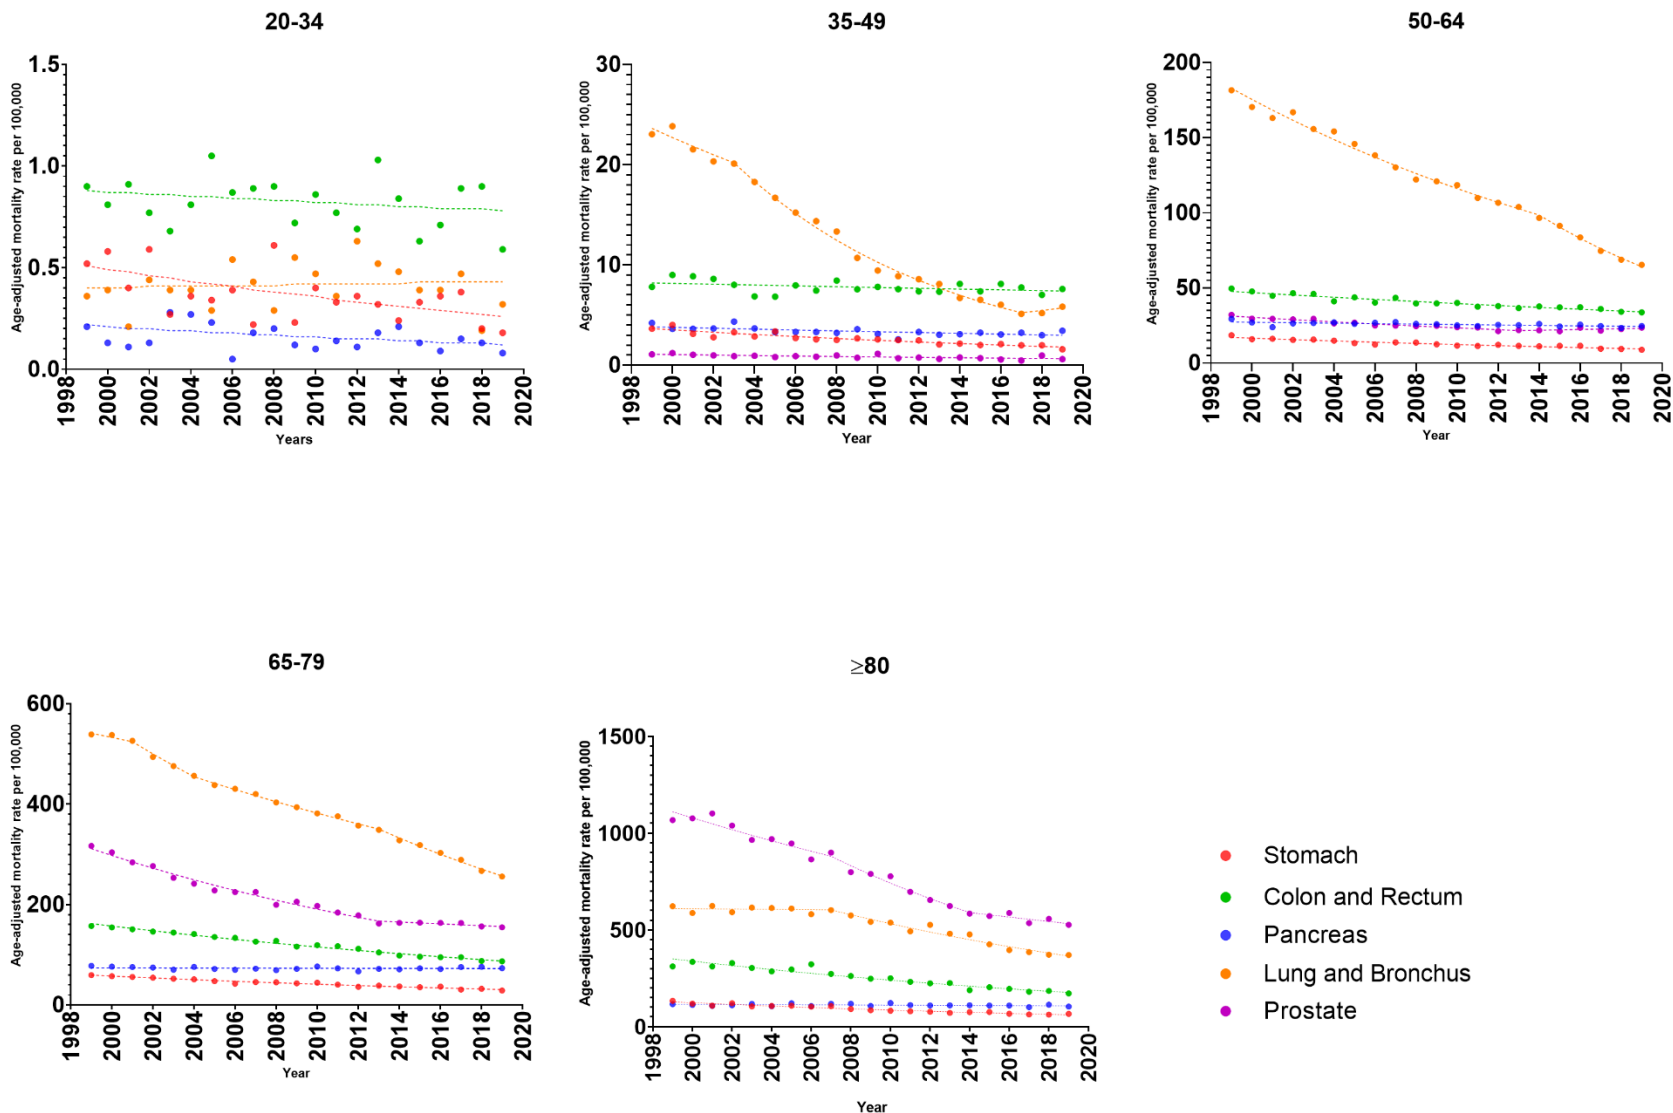

**Figure 2.** Trends in age-standardized death rates (1999-2019) among Black men by cancer site and age group. Death rates covered the entire US population. Trends were estimated using joinpoint regression and characterized by rate per 100,000. Note: “---” represents modeled age-adjusted and “●” represents observed age-adjusted rates.

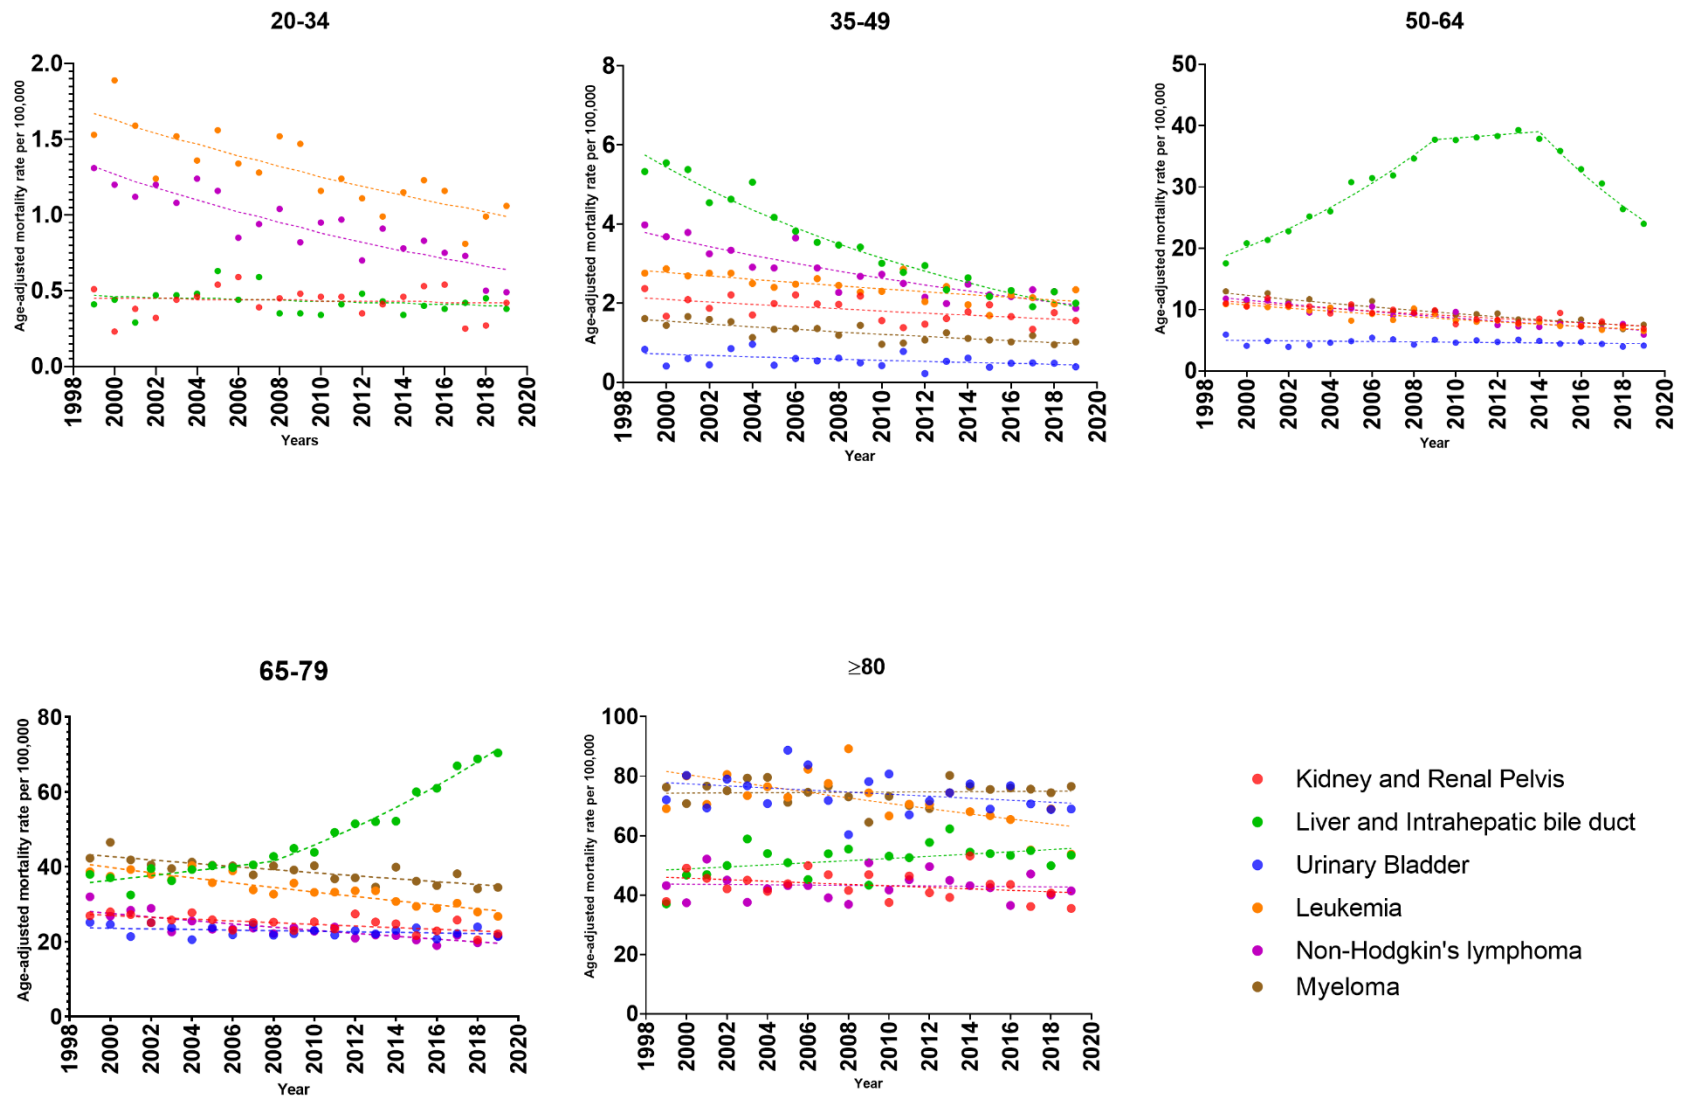

(Continued) eFigure 2. Trends in age-standardized death rates (1999-2019) among Black men by cancer site and age group. Death rates covered the entire US population. Trends were estimated using joinpoint regression and characterized by rate per 100,000. Note: “---“represents modeled age-adjusted and “●“ represents observed age-adjusted rates.



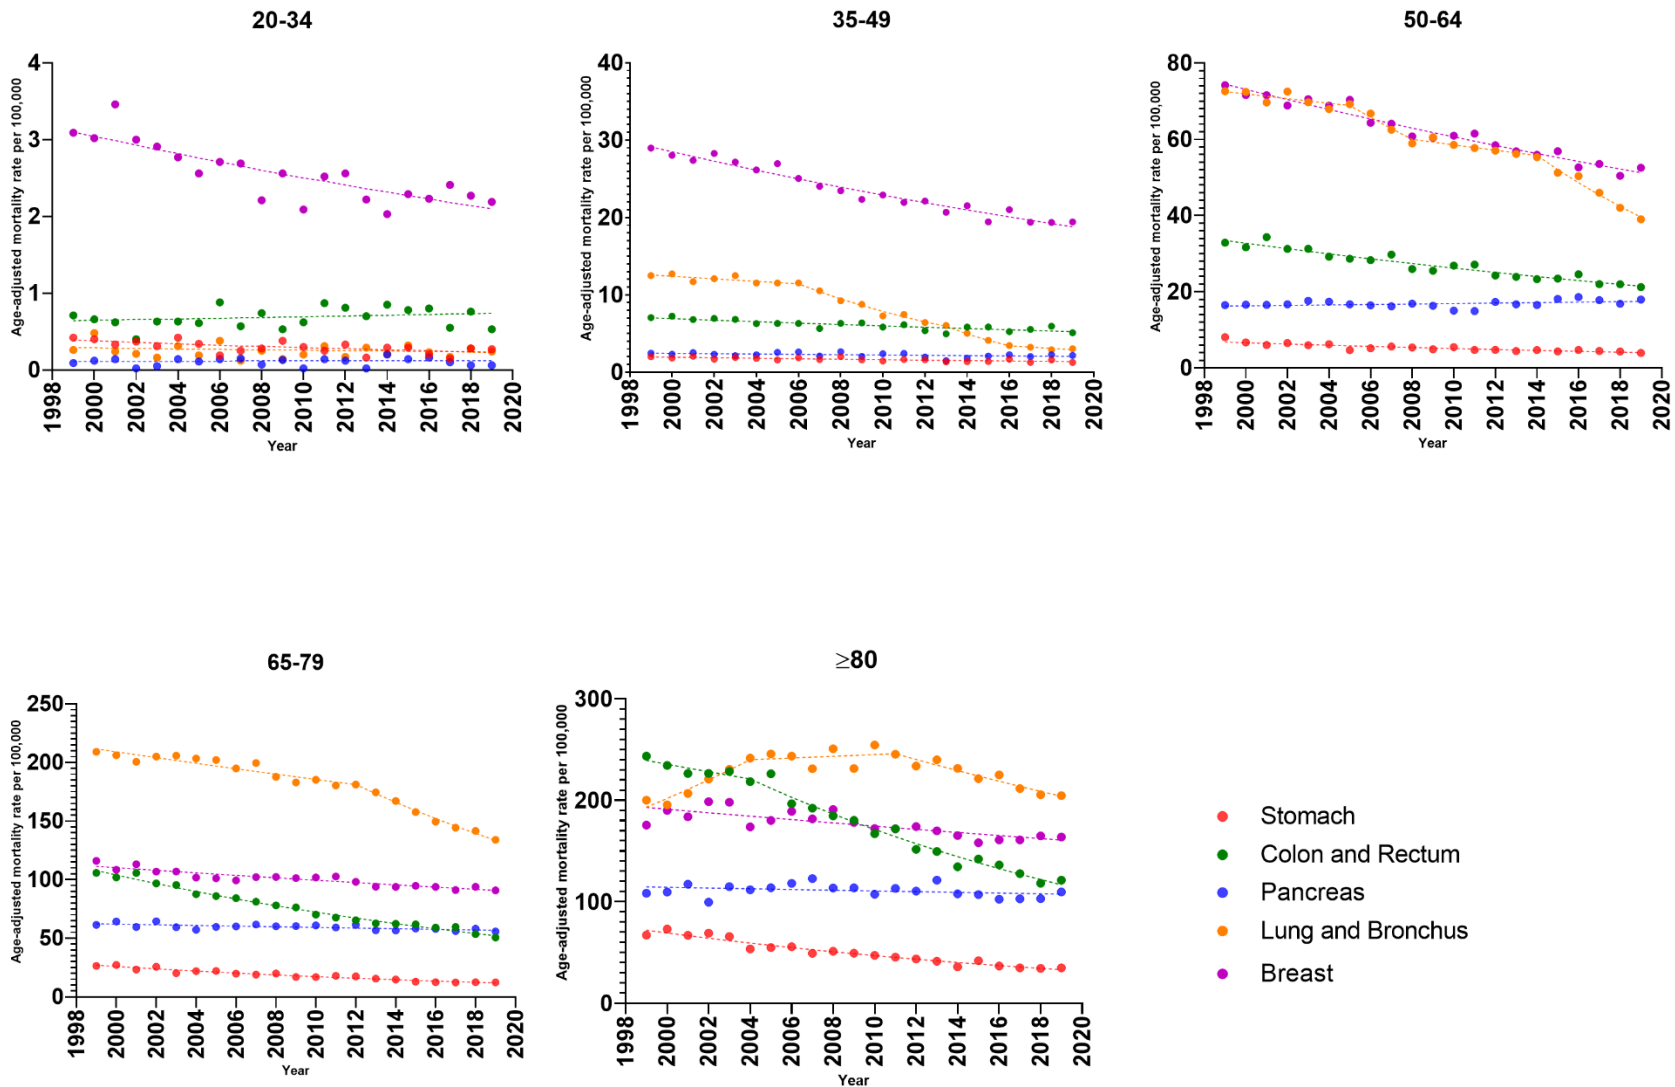

**eFigure 3.** Trends in age-standardized death rates (1999-2019) among Black women by cancer site and age group. Death rates covered the entire US population. Trends were estimated using joinpoint regression and characterized by rate per 100,000. Note: “---” represents modeled age-adjusted and “●” represents observed age-adjusted rates

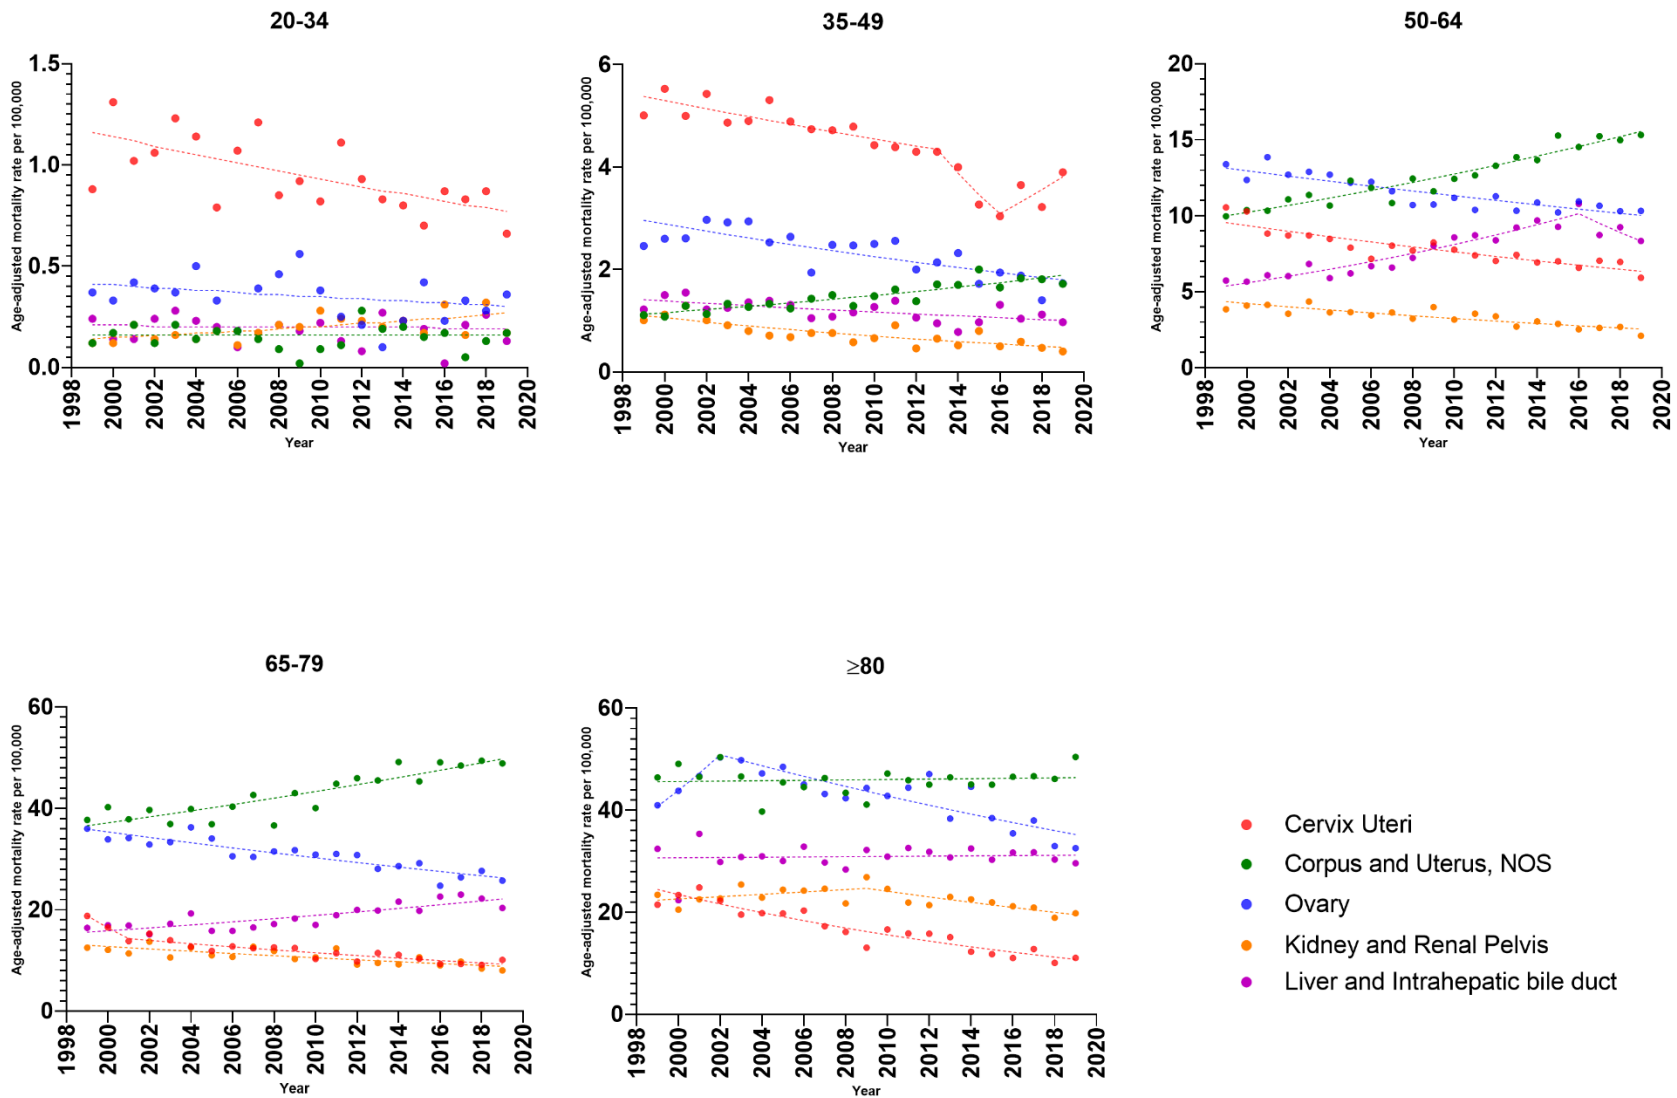

(Continued) eFigure 3. Trends in age-standardized death rates (1999-2019) among Black women by cancer site and age group. Death rates covered the entire US population. Trends were estimated using joinpoint regression and characterized by rate per 100,000.

Note: “---“represents modeled age-adjusted and “●” represents observed age-adjusted rates.

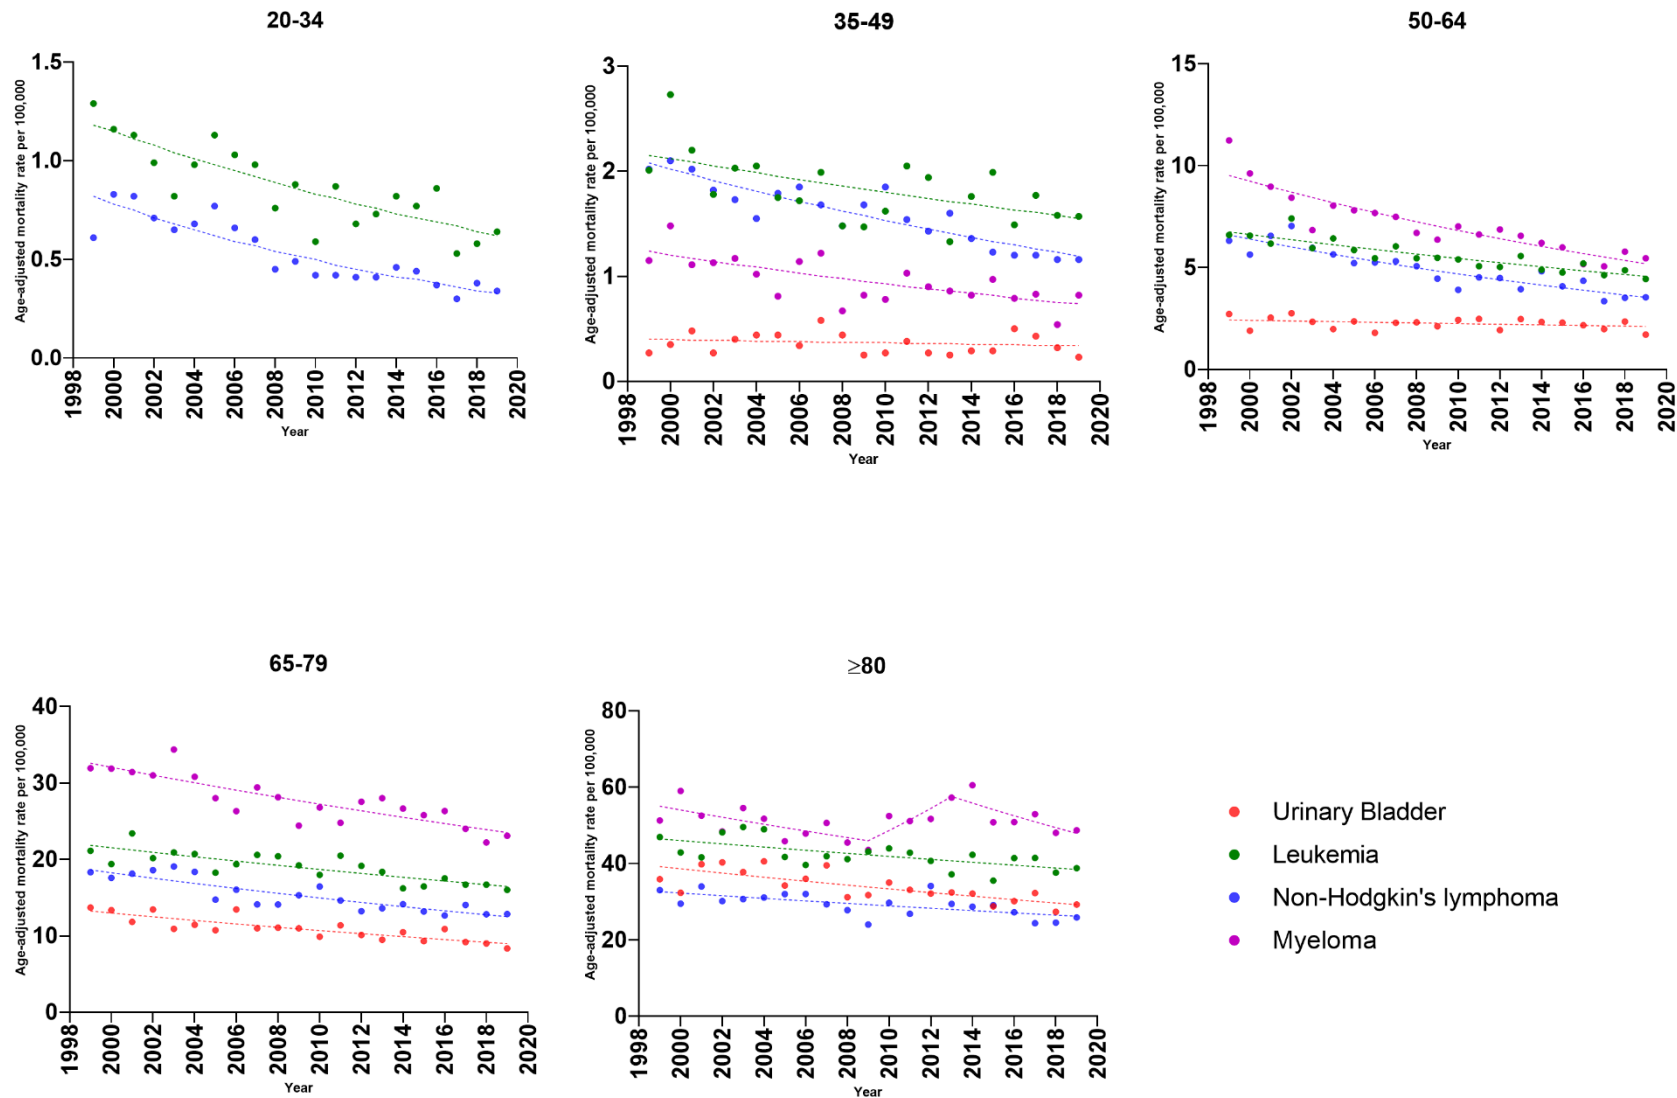

(Continued) eFigure 3. Trends in age-standardized death rates (1999-2019) among Black women by cancer site and age group. Death rates covered the entire US population. Trends were estimated using joinpoint regression and characterized by rate per 100,000. Note: “---“represents modeled age-adjusted and “●” represents observed age-adjusted rates.
